# Supplementary material
Source: PubMed Central journal article supplement (PMC3401213)
Supplement: supp_blood-2011-11-327361_blood-2011-11-327361-1.pdf [file supp_blood-2011-11-327361_blood-2011-11-327361-1.pdf]

## Supplemental File

**Table S1.** Summary of case reports of DHTR. Presence or absence of detectable antibodies and indication for transfusion for each case is listed. Abbreviations: DHTR, Delayed Hemolytic Transfusion Reaction; Ab, antibody; NA, not available; NC, not characterized; VOC, vaso occlusive crisis; ACS, acute chest syndrome.

| Publication<br>(year, author, reference) | Cases | Pre-DHTR Abs                                             | Additional Abs in<br>history                  | Post DHTR additional Abs                                  | Indication for transfusion | Outcome |
|------------------------------------------|-------|----------------------------------------------------------|-----------------------------------------------|-----------------------------------------------------------|----------------------------|---------|
| 1984, Brumbeld, <sup>89</sup>            | 1     | none                                                     | none                                          | E, K, Fya, Jkb, Cw, IH                                    | pregnancy                  |         |
| 1985, Milner, <sup>75</sup>              | 1     | none                                                     | none                                          | none                                                      | stomach surgery            | Died    |
|                                          | 2     | K, M                                                     | none                                          | NA                                                        | cholecystectomy            | Died    |
|                                          | 3     | NA                                                       | NA                                            | C, E, S, Le <sup>a</sup> , Le <sup>b</sup>                | cholecystectomy            |         |
|                                          | 4     | none                                                     | Jk <sup>b</sup>                               | Jk <sup>b</sup>                                           | gynaecologic surgery       |         |
|                                          | 5     | C,E, Fy <sup>a</sup>                                     | NA                                            | S                                                         | ACS                        |         |
|                                          | 6     | M, C, E                                                  | Le <sup>a</sup> , Le <sup>b</sup>             | Fy <sup>a</sup> , S, Jk <sup>b</sup>                      | VOC                        |         |
|                                          | 7     | no                                                       | no                                            | auto antibodies                                           | anemia                     |         |
|                                          | 8     | no                                                       | E, C, K, Jk <sup>a</sup>                      | C, E, Jk <sup>a</sup>                                     |                            |         |
|                                          | 9     | NA                                                       | E, C, Fy <sup>a</sup> , K, V, Jk <sup>a</sup> | yes, NC                                                   | pneumonia, anemia          |         |
|                                          | 10    | none                                                     | none                                          | E                                                         | cholecystectomy            |         |
| 1985, Squires, <sup>33</sup>             | 1     | none                                                     | none                                          | Co <sup>b</sup>                                           | pregnancy                  |         |
| 1988, Cox, <sup>10</sup>                 | 1     | none                                                     | NA                                            | Hr <sup>B</sup> , Fy <sup>a</sup> , E                     | cholecystectomy            |         |
|                                          | 2     | none                                                     | none                                          | C, E                                                      | ACS                        |         |
|                                          | 3     | none                                                     | none                                          | RH46                                                      | fever, anemia              |         |
| 1988, Bowen, <sup>90</sup>               | 1     | S                                                        | none                                          | E, Fy <sup>a</sup> , Fy5                                  | abortion                   |         |
| 1989, Rao, <sup>114</sup>                | 1     | yes, NC                                                  | none                                          | none                                                      | cholecystectomy            |         |
|                                          | 2     | E                                                        | none                                          | C, M, Fy <sup>a</sup>                                     | ACS                        |         |
|                                          | 3     | E                                                        | none                                          | Jk <sup>a</sup>                                           | anemia (parvovirus)        |         |
| 1993, Thornton, <sup>91</sup>            | 1     | NA                                                       | NA                                            | C, E, Fy <sup>a</sup> , Fy <sup>b</sup>                   | dental surgery             |         |
| 1996, Syed, <sup>92</sup>                | 1     | Fy <sup>a</sup>                                          | none                                          | Jk <sup>b</sup> , M, s                                    | atrial septal defect       |         |
|                                          | 2     | C, K, Fy <sup>a</sup> , S                                | E, Jk <sup>b</sup>                            | Fy3, Fy <sup>b</sup>                                      | ACS, pregnancy             |         |
|                                          | 3     | none                                                     | none                                          | C, E                                                      | malleolar ulcer            |         |
|                                          | 4     | E, Fy <sup>b</sup> , S, V, auto                          | none                                          | Yes, NC                                                   | priapism                   |         |
| 1996, Larson, <sup>95</sup>              | 1     | E, K, Fy <sup>a</sup> , Le <sup>a</sup> , Bg             | none                                          | Go <sup>a</sup>                                           | cerebral vasculopathy      |         |
| 1997, Petz, <sup>115</sup>               | 1     | K, Fy <sup>a</sup>                                       | NA                                            | C, Jk <sup>b</sup> , Js <sup>a</sup> , M                  | painful crisis, infection  |         |
|                                          | 2     | E, C, K, S                                               | NA                                            | Fy <sup>a</sup> , Jk <sup>b</sup>                         | painful crisis             |         |
|                                          | 3     | E, C <sup>w</sup> , S, Fy <sup>a</sup> , Fy <sup>b</sup> | auto-C                                        | none                                                      | painful crisis             |         |
|                                          | 4     | none                                                     | NA                                            | Lea, E, M, S                                              | abdominal pain,            |         |
|                                          | 5     | none                                                     | NA                                            | C, E, Jk <sup>b</sup> , Fy <sup>a</sup> , Fy <sup>b</sup> | pneumonia bone pain        |         |
| 1997, King, <sup>97</sup>                | 1     | Fy <sup>a</sup>                                          | none                                          | E, S                                                      | orthopaedic surgery        |         |
|                                          | 2     | none                                                     | none                                          | E, Jk <sup>a</sup>                                        | painful crisis             |         |
|                                          | 3     | none                                                     | none                                          | none                                                      | orthopaedic surgery        |         |

|                                       |     |                                                                    |                      |                               |                               |      |
|---------------------------------------|-----|--------------------------------------------------------------------|----------------------|-------------------------------|-------------------------------|------|
|                                       | 4   | C, M                                                               | none                 | Fy <sup>a</sup>               | cholecystectomy               |      |
|                                       | 5   | C, M, S, Fy <sup>a</sup> , Jk <sup>b</sup> , K                     | none                 | none                          | orthopaedic surgery           |      |
| 1997, Anderson <sup>32</sup>          | 1   | E, M, Fy <sup>a</sup> , Jk <sup>b</sup>                            | None                 | Js <sup>a</sup>               | parathyroidectomy             |      |
| 1999, Kalyanaraman, <sup>77</sup>     | 1   | E                                                                  | none                 | s                             | VOC                           |      |
| 1999, Fabron <sup>76</sup>            | 1   | NA                                                                 | NA                   | c                             | cholecystectomy               |      |
| 2001, Win, <sup>74</sup>              | 1   | none                                                               | none                 | none                          | ACS , delivery                |      |
|                                       | 2   | auto-antibodies                                                    | none                 | panagglutination              | asthenia, anemia              |      |
| 2002, Noizat-Pirenne, <sup>94</sup>   | 1   | C, Fy <sup>a</sup> , S                                             | none                 | Hr <sup>S</sup>               | pregnancy                     | died |
|                                       | 1   | none                                                               | none                 | Hr <sup>S</sup>               | VOC                           | died |
| 2002 Aygun <sup>64</sup>              | 1   | C, E, Fy <sup>b</sup> , Jk <sup>b</sup>                            | none (or in H)       | autoantibody                  | NA                            |      |
|                                       | 2   | C, E, Fy <sup>a</sup> , Jk <sup>b</sup> , K, s, V, Js <sup>b</sup> | none (or in H)       | none                          | NA                            | died |
|                                       | 3   | none                                                               | none                 | E, cold auto-i                | NA                            |      |
|                                       | 4   | none                                                               | none                 | E, Jk <sup>b</sup> , S, C     | NA                            |      |
|                                       | 5   | none                                                               | none                 | K, E , autoantibody           | NA                            |      |
| 2003, Talano, <sup>116</sup>          | 1   | none                                                               | NA                   | Warm autoantibodies           | NA                            |      |
|                                       | 2   | C, S, Jk <sup>b</sup>                                              | NA                   | Fy <sup>b</sup>               | NA                            |      |
|                                       | 3   | none                                                               | NA                   | E, Lea                        | NA                            |      |
|                                       | 4   | none                                                               | NA                   | E                             | NA                            |      |
|                                       | 5-7 | none                                                               | NA                   | none                          | NA                            |      |
| 2005, McGlennan <sup>93</sup>         | 1   | none                                                               | NA                   | S, Jk <sup>b</sup>            | hip replacment                |      |
| 2007, Proudfit, <sup>73</sup>         | 1   | E, Fy <sup>a</sup> , C, c, Jk <sup>a</sup> , Jk <sup>b</sup>       | NA                   | I                             | caesarean delivery            |      |
| 2007, Noizat-Pirenne <sup>5</sup>     | 1   | none                                                               | C, Fya, Ytb, S, RH23 | auto-antibodies               | hip replacement               |      |
| 2008, Win, <sup>74</sup>              | 1   | none                                                               | none                 | none                          | painful crisis                |      |
| 2008, Elenga <sup>117</sup>           | 1   | none                                                               | S                    | none                          | cholecystectomy               |      |
|                                       | 2   | none                                                               | none                 | none (weak IgG DAT)           | cholecystectomy               |      |
| 2009, Bachmeyer, <sup>101</sup>       | 1   | M                                                                  | none                 | Le <sup>b</sup>               | VOC                           |      |
| 2009, Islam, <sup>118</sup>           | 1   | E, M, Fy <sup>a</sup> , Fy3, Jk <sup>b</sup>                       | NA                   | none                          | pain                          |      |
| 2009, Chadebech <sup>80</sup>         | 1-2 | none                                                               | none                 | none                          | VOC/ACS                       |      |
|                                       | 3   | none                                                               | none                 | none (weak IgG DAT)           | VOC                           |      |
| 2010, de Montalembert, <sup>100</sup> | 1-4 | none                                                               | none                 | none                          | trip prevention, 2 VOC, fever |      |
|                                       | 5   | C, M                                                               | none                 | none                          | surgery                       |      |
|                                       | 6   | M                                                                  | none                 | weak reactivity               | abnormal TCD                  |      |
|                                       | 7   | weak reactivity                                                    | weak reactivity      | D (of partial), S             | surgery                       |      |
|                                       | 8   | Le <sup>b</sup> , weak reactivity                                  | none                 | D, C, e, Fy3, Kp <sup>a</sup> | surgery                       |      |

### Additional references in supplemental Table

114. Rao KR, Patel AR. Delayed hemolytic transfusion reactions in sickle cell anemia. *South Med J.* 1989;82:1034-1036.
115. Petz LD, Calhoun L, Shulman IA, Johnson C, Herron RM. The sickle cell hemolytic transfusion reaction syndrome. *Transfusion.* 1997;37:382-392.

116. Talano JA, Hillery CA, Gottschall JL, Baylerian DM, Scott JP. Delayed hemolytic transfusion reaction/hyperhemolysis syndrome in children with sickle cell disease. *Pediatrics*. 2003;111:e661-665.
117. Elenga N, Mialou V, Kebaili K, Galambrun C, Bertrand Y, Pondarre C. Severe neurologic complication after delayed hemolytic transfusion reaction in 2 children with sickle cell anemia: significant diagnosis and therapeutic challenges. *J Pediatr Hematol Oncol*. 2008;30:928-930.
118. Islam MS, Chia L. Hyperhemolysis syndrome in a patient with sickle cell disease with erythrophagocytosis in peripheral blood. *Eur J Haematol*. 2009;84:188.
